# Supplementary material for: Ecophysiology of uncultivated marine euryarchaea is linked to particulate organic matter
Source: PubMed Central journal article supplement — ISME J. 2015 Jan 23;9(8):1747–63. doi: 10.1038/ismej.2014.260 (PMC4511931; doi:10.1038/ismej.2014.260), 2015-01-23
Supplement: ismej2014260x5.pdf [file ismej2014260x5.pdf]

| Data type                                                                                                                                                            | Latitude (N)                                                                      | Longitude (W) | Station | Depth (m)              | Size fraction (µm)            | Number of reads               |
|----------------------------------------------------------------------------------------------------------------------------------------------------------------------|-----------------------------------------------------------------------------------|---------------|---------|------------------------|-------------------------------|-------------------------------|
| 454-FLX sequenced metagenome samples<br>[n=12, Cruise CN207, 2007]                                                                                                   | 33.33                                                                             | -129.43       | 67.155  | 81                     | 0.1-0.8                       | 605798                        |
|                                                                                                                                                                      | 33.33                                                                             | -129.43       | 67.155  | 81                     | 0.8-3                         | 302166                        |
|                                                                                                                                                                      | 33.33                                                                             | -129.43       | 67.155  | 81                     | 3-20                          | 516556                        |
|                                                                                                                                                                      | 33.33                                                                             | -129.43       | 67.155  | 5                      | 0.1-0.8                       | 403975                        |
|                                                                                                                                                                      | 33.33                                                                             | -129.43       | 67.155  | 5                      | 0.8-3                         | 307877                        |
|                                                                                                                                                                      | 33.33                                                                             | -129.43       | 67.155  | 5                      | 3-20                          | 343412                        |
|                                                                                                                                                                      | 36.74                                                                             | -122.02       | 67.70   | 5                      | 0.1-0.8                       | 529881                        |
|                                                                                                                                                                      | 36.74                                                                             | -122.02       | 67.70   | 5                      | 0.8-3                         | 445940                        |
|                                                                                                                                                                      | 36.74                                                                             | -122.02       | 67.70   | 5                      | 3-20                          | 363003                        |
|                                                                                                                                                                      | 36.13                                                                             | -123.49       | H3      | 10                     | 0.1-0.8                       | 433089                        |
|                                                                                                                                                                      | 36.13                                                                             | -123.49       | H3      | 10                     | 0.8-3                         | 524390                        |
|                                                                                                                                                                      | 36.13                                                                             | -123.49       | H3      | 10                     | 3-20                          | 472893                        |
|                                                                                                                                                                      | Sanger sequenced MGII 16S rRNA gene clone libraries<br>[n=12, Cruise CN207, 2007] | 33.33         | -129.43 | 67.155                 | 81                            | 0.1-0.8                       |
| 33.33                                                                                                                                                                |                                                                                   | -129.43       | 67.155  | 81                     | 0.8-3                         | 218                           |
| 33.33                                                                                                                                                                |                                                                                   | -129.43       | 67.155  | 81                     | 3-20                          | 109                           |
| 33.33                                                                                                                                                                |                                                                                   | -129.43       | 67.155  | 5                      | 0.1-0.8                       | 208                           |
| 33.33                                                                                                                                                                |                                                                                   | -129.43       | 67.155  | 5                      | 0.8-3                         | 116                           |
| 33.33                                                                                                                                                                |                                                                                   | -129.43       | 67.155  | 5                      | 3-20                          | 127                           |
| 36.74                                                                                                                                                                |                                                                                   | -122.02       | 67.70   | 5                      | 0.1-0.8                       | 20                            |
| 36.74                                                                                                                                                                |                                                                                   | -122.02       | 67.70   | 5                      | 0.8-3                         | 59                            |
| 36.74                                                                                                                                                                |                                                                                   | -122.02       | 67.70   | 5                      | 3-20                          | 123                           |
| 36.13                                                                                                                                                                |                                                                                   | -123.49       | H3      | 10                     | 0.1-0.8                       | 89                            |
| 36.13                                                                                                                                                                |                                                                                   | -123.49       | H3      | 10                     | 0.8-3                         | 119                           |
| 36.13                                                                                                                                                                |                                                                                   | -123.49       | H3      | 10                     | 3-20                          | 109                           |
| MGII qPCR samples<br>[n=60, Cruise CO912, 2012]                                                                                                                      |                                                                                   | 36.79         | -121.84 | C1                     | 20                            | 0.2 - 0.8, 0.8 - 3, 3-10, >10 |
|                                                                                                                                                                      | 36.79                                                                             | -121.84       | C1      | 40                     | 0.2 - 0.8, 0.8 - 3, 3-10, >10 | N/A                           |
|                                                                                                                                                                      | 36.13                                                                             | -123.49       | H3      | 5                      | 0.2 - 0.8, 0.8 - 3, 3-10, >10 | N/A                           |
|                                                                                                                                                                      | 36.13                                                                             | -123.49       | H3      | 20                     | 0.2 - 0.8, 0.8 - 3, 3-10, >10 | N/A                           |
|                                                                                                                                                                      | 36.13                                                                             | -123.49       | H3      | 30                     | 0.2 - 0.8, 0.8 - 3, 3-10, >10 | N/A                           |
|                                                                                                                                                                      | 36.45                                                                             | -122.77       | 67.60   | 5                      | 0.2 - 0.8, 0.8 - 3, 3-10, >10 | N/A                           |
|                                                                                                                                                                      | 36.45                                                                             | -122.77       | 67.60   | 20                     | 0.2 - 0.8, 0.8 - 3, 3-10, >10 | N/A                           |
|                                                                                                                                                                      | 36.45                                                                             | -122.77       | 67.60   | 30                     | 0.2 - 0.8, 0.8 - 3, 3-10, >10 | N/A                           |
|                                                                                                                                                                      | 36.45                                                                             | -122.77       | 67.60   | 40                     | 0.2 - 0.8, 0.8 - 3, 3-10, >10 | N/A                           |
|                                                                                                                                                                      | 36.74                                                                             | -122.02       | 67.70   | 5                      | 0.2 - 0.8, 0.8 - 3, 3-10, >10 | N/A                           |
|                                                                                                                                                                      | 36.74                                                                             | -122.02       | 67.70   | 20                     | 0.2 - 0.8, 0.8 - 3, >3        | N/A                           |
|                                                                                                                                                                      | 36.74                                                                             | -122.02       | 67.70   | 30                     | 0.2 - 0.8, 0.8 - 3, >3        | N/A                           |
|                                                                                                                                                                      | 36.74                                                                             | -122.02       | 67.70   | 40                     | 0.2 - 0.8, 0.8 - 3, >3        | N/A                           |
|                                                                                                                                                                      | 35.79                                                                             | -124.19       | 67.80   | 5                      | 0.2 - 0.8, 0.8 - 3, >3        | N/A                           |
|                                                                                                                                                                      | 35.79                                                                             | -124.19       | 67.80   | 30                     | 0.2 - 0.8, 0.8 - 3, >3        | N/A                           |
|                                                                                                                                                                      | 35.79                                                                             | -124.19       | 67.80   | 40                     | 0.2 - 0.8, 0.8 - 3, >3        | N/A                           |
|                                                                                                                                                                      | 35.45                                                                             | -124.91       | 67.90   | 5                      | 0.2 - 0.8, 0.8 - 3, >3        | N/A                           |
| 35.45                                                                                                                                                                | -124.91                                                                           | 67.90         | 30      | 0.2 - 0.8, 0.8 - 3, >3 | N/A                           |                               |
| 35.45                                                                                                                                                                | -124.91                                                                           | 67.90         | 40      | 0.2 - 0.8, 0.8 - 3, >3 | N/A                           |                               |
| Samples for Illumina (MiSeq) sequencing of MGII V4 16S rRNA genes<br>[n=43, Cruise CO912, 2012]                                                                      | 36.45                                                                             | -122.77       | 67.60   | 10                     | 0.2-10                        | 84842                         |
|                                                                                                                                                                      | 36.45                                                                             | -122.77       | 67.60   | 10                     | 0.2-10                        | 86445                         |
|                                                                                                                                                                      | 36.45                                                                             | -122.77       | 67.60   | 15                     | 0.2-10                        | 78869                         |
|                                                                                                                                                                      | 36.45                                                                             | -122.77       | 67.60   | 15                     | 0.2-10                        | 113905                        |
|                                                                                                                                                                      | 36.45                                                                             | -122.77       | 67.60   | 20                     | 0.2-10                        | 77855                         |
|                                                                                                                                                                      | 36.45                                                                             | -122.77       | 67.60   | 20                     | 0.2-10                        | 133932                        |
|                                                                                                                                                                      | 36.45                                                                             | -122.77       | 67.60   | 30                     | 0.2-10                        | 147414                        |
|                                                                                                                                                                      | 36.45                                                                             | -122.77       | 67.60   | 35                     | 0.2-10                        | 100281                        |
|                                                                                                                                                                      | 36.45                                                                             | -122.77       | 67.60   | 35                     | 0.2-10                        | 145414                        |
|                                                                                                                                                                      | 36.45                                                                             | -122.77       | 67.60   | 50                     | 0.2-10                        | 94201                         |
|                                                                                                                                                                      | 36.45                                                                             | -122.77       | 67.60   | 50                     | 0.2-10                        | 69114                         |
|                                                                                                                                                                      | 36.45                                                                             | -122.77       | 67.60   | 80                     | 0.2-10                        | 98148                         |
|                                                                                                                                                                      | 36.45                                                                             | -122.77       | 67.60   | 80                     | 0.2-10                        | 87908                         |
|                                                                                                                                                                      | 36.36                                                                             | -122.46       | 67.60   | 10                     | 0.2-10                        | 64069                         |
|                                                                                                                                                                      | 36.36                                                                             | -122.46       | 67.60   | 15                     | 0.2-10                        | 159560                        |
|                                                                                                                                                                      | 36.36                                                                             | -122.46       | 67.60   | 20                     | 0.2-10                        | 77037                         |
|                                                                                                                                                                      | 36.36                                                                             | -122.46       | 67.60   | 35                     | 0.2-10                        | 57494                         |
|                                                                                                                                                                      | 36.36                                                                             | -122.46       | 67.60   | 50                     | 0.2-10                        | 66187                         |
|                                                                                                                                                                      | 36.36                                                                             | -122.46       | 67.60   | 80                     | 0.2-10                        | 69455                         |
|                                                                                                                                                                      | 36.28                                                                             | -122.34       | 67.60   | 10                     | 0.2-10                        | 74632                         |
|                                                                                                                                                                      | 36.28                                                                             | -122.34       | 67.60   | 15                     | 0.2-10                        | 85596                         |
|                                                                                                                                                                      | 36.28                                                                             | -122.34       | 67.60   | 20                     | 0.2-10                        | 180384                        |
|                                                                                                                                                                      | 36.28                                                                             | -122.34       | 67.60   | 35                     | 0.2-10                        | 82383                         |
|                                                                                                                                                                      | 36.28                                                                             | -122.34       | 67.60   | 50                     | 0.2-10                        | 75778                         |
|                                                                                                                                                                      | 36.28                                                                             | -122.34       | 67.60   | 80                     | 0.2-10                        | 62125                         |
|                                                                                                                                                                      | 36.26                                                                             | -122.33       | 67.60   | 10                     | 0.2-10                        | 164498                        |
|                                                                                                                                                                      | 36.26                                                                             | -122.33       | 67.60   | 15                     | 0.2-10                        | 173544                        |
|                                                                                                                                                                      | 36.26                                                                             | -122.33       | 67.60   | 20                     | 0.2-10                        | 75741                         |
|                                                                                                                                                                      | 36.26                                                                             | -122.33       | 67.60   | 35                     | 0.2-10                        | 61506                         |
|                                                                                                                                                                      | 36.26                                                                             | -122.33       | 67.60   | 50                     | 0.2-10                        | 76657                         |
|                                                                                                                                                                      | 36.26                                                                             | -122.33       | 67.60   | 80                     | 0.2-10                        | 78602                         |
|                                                                                                                                                                      | 35.79                                                                             | -122.31       | 67.60   | 10                     | 0.2-10                        | 180726                        |
|                                                                                                                                                                      | 35.79                                                                             | -122.31       | 67.60   | 15                     | 0.2-10                        | 175554                        |
| 35.79                                                                                                                                                                | -122.31                                                                           | 67.60         | 20      | 0.2-10                 | 62383                         |                               |
| 35.79                                                                                                                                                                | -122.31                                                                           | 67.60         | 35      | 0.2-10                 | 73719                         |                               |
| 35.79                                                                                                                                                                | -122.31                                                                           | 67.60         | 50      | 0.2-10                 | 62827                         |                               |
| 35.79                                                                                                                                                                | -122.31                                                                           | 67.60         | 80      | 0.2-10                 | 75327                         |                               |
| 36.24                                                                                                                                                                | -122.21                                                                           | 67.60         | 10      | 0.2-10                 | 63357                         |                               |
| 36.24                                                                                                                                                                | -122.21                                                                           | 67.60         | 15      | 0.2-10                 | 72933                         |                               |
| 36.24                                                                                                                                                                | -122.21                                                                           | 67.60         | 20      | 0.2-10                 | 63269                         |                               |
| 36.24                                                                                                                                                                | -122.21                                                                           | 67.60         | 35      | 0.2-10                 | 72074                         |                               |
| 36.24                                                                                                                                                                | -122.21                                                                           | 67.60         | 50      | 0.2-10                 | 79712                         |                               |
| 36.24                                                                                                                                                                | -122.21                                                                           | 67.60         | 80      | 0.2-10                 | 138266                        |                               |
| Flow cytometric sorting, WGA, and MGII 16S screens of lysotracker stained [n = 6] and chlorophyll containing [n = 19] eukaryotic populations<br>[Cruise CO912, 2012] | 36.45                                                                             | -122.77       | 67.60   | 5                      | ~1-15                         | 8 (18S rRNA clones)           |
|                                                                                                                                                                      | 36.45                                                                             | -122.77       | 67.60   | 80                     | ~1-15                         | N/A                           |
|                                                                                                                                                                      | 35.45                                                                             | -124.91       | 67.90   | 40                     | ~1-15                         | 8 (18S rRNA clones)           |
|                                                                                                                                                                      | 36.28                                                                             | -122.34       | 67.60   | 20                     | ~1-15                         | N/A                           |
| Bottle experiments with phytoplankton enrichments for MGII growth/qPCR<br>[n=2, Cruise CO912, 2012]                                                                  | 36.28                                                                             | -122.34       | 67.60   | 10                     | 0.2 - 0.8, 0.8 - 3, 3-10      | N/A                           |
| CARD-FISH [n=1, Cruise CN131D, 2013]                                                                                                                                 | 36.74                                                                             | -122.02       | 67.70   | 20                     | > 0.2 µm                      | N/A                           |
