# Supplementary material for: Ecophysiology of uncultivated marine euryarchaea is linked to particulate organic matter
Source: PubMed Central journal article supplement — ISME J. 2015 Jan 23;9(8):1747–63. doi: 10.1038/ismej.2014.260 (PMC4511931; doi:10.1038/ismej.2014.260), 2015-01-23
Supplement: ismej2014260x6.pdf [file ismej2014260x6.pdf]

| Site  | Depth (m) | 0.2-0.8 $\mu\text{m}$        |      | 0.8-3 $\mu\text{m}$          |     | 3-10 $\mu\text{m}$           |    | >10 $\mu\text{m}$             |    |
|-------|-----------|------------------------------|------|------------------------------|-----|------------------------------|----|-------------------------------|----|
|       |           | Mean copies mL <sup>-1</sup> | SD   | Mean copies mL <sup>-1</sup> | SD  | Mean copies mL <sup>-1</sup> | SD | Mean copies mL <sup>-1</sup>  | SD |
| C1    | 20        | 16099                        | 781  | 3071                         | 218 | 47                           | 3  | 50                            | 2  |
| C1    | 40        | 9632                         | 342  | 3250                         | 340 | 19                           | 0  | 143                           | 5  |
| H3    | 5         | 31900                        | 797  | 2374                         | 142 | 13                           | 0  | 47                            | 5  |
| H3    | 20        | 32353                        | 351  | 6088                         | 292 | 7                            | 1  | 45                            | 2  |
| H3    | 30        | 31862                        | 4106 | 6400                         | 280 | 6                            | 1  | 87                            | 6  |
| 67.60 | 5         | 1545                         | 3    | 7333                         | 39  | 9                            | 0  | 54                            | 16 |
| 67.60 | 20        | 35                           | 6    | 1209                         | 76  | 48                           | 2  | 225                           | 50 |
| 67.60 | 30        | 12291                        | 495  | 514                          | 23  | 9                            | 1  | no data                       |    |
| 67.60 | 40        | 5890                         | 770  | 2179                         | 131 | 6                            | 0  | 96                            | 24 |
| 67.70 | 5         | 556                          | 1    | 2169                         | 210 | 33                           | 5  | no 10 $\mu\text{m}$ prefilter |    |
| 67.70 | 20        | 3581                         | 280  | 1670                         | 109 | 73                           | 4  | no 10 $\mu\text{m}$ prefilter |    |
| 67.70 | 30        | 531                          | 38   | 1631                         | 108 | 23                           | 0  | no 10 $\mu\text{m}$ prefilter |    |
| 67.70 | 40        | 1018                         | 85   | 2246                         | 62  | 109                          | 5  | no 10 $\mu\text{m}$ prefilter |    |
| 67.80 | 5         | 277                          | 41   | 3477                         | 142 | 28                           | 2  | no 10 $\mu\text{m}$ prefilter |    |
| 67.80 | 30        | 432                          | 17   | 4373                         | 268 | 10                           | 1  | no 10 $\mu\text{m}$ prefilter |    |
| 67.80 | 40        | 9889                         | 779  | 2477                         | 75  | 13                           | 3  | no 10 $\mu\text{m}$ prefilter |    |
| 67.90 | 5         | 4                            | 0    | 723                          | 14  | 38                           | 2  | no 10 $\mu\text{m}$ prefilter |    |
| 67.90 | 30        | 2273                         | 526  | 2966                         | 6   | 13                           | 1  | no 10 $\mu\text{m}$ prefilter |    |
| 67.90 | 40        | 1567                         | 152  | 3563                         | 615 | 4                            | 0  | no 10 $\mu\text{m}$ prefilter |    |
