# Supplementary material for: Ecophysiology of uncultivated marine euryarchaea is linked to particulate organic matter
Source: PubMed Central journal article supplement — ISME J. 2015 Jan 23;9(8):1747–63. doi: 10.1038/ismej.2014.260 (PMC4511931; doi:10.1038/ismej.2014.260), 2015-01-23
Supplement: ismej2014260x7.pdf [file ismej2014260x7.pdf]

| Parameter        | Variance in community structure explained | Significance ( <i>P</i> ) |
|------------------|-------------------------------------------|---------------------------|
| Silica           | 29%                                       | 0.001                     |
| Nitrate          | 27%                                       | 0.001                     |
| Oxygen           | 25%                                       | 0.001                     |
| Temperature      | 23%                                       | 0.001                     |
| Phosphate        | 22%                                       | 0.001                     |
| Beam attenuation | 22%                                       | 0.001                     |
| Chlorophyll a    | 20%                                       | 0.001                     |
| Salinity         | 15%                                       | 0.002                     |
| Ammonia          | 13%                                       | 0.038                     |
| Nitrite          | 7%                                        | 0.52                      |
