# Supplementary material for: Ecophysiology of uncultivated marine euryarchaea is linked to particulate organic matter
Source: PubMed Central journal article supplement — ISME J. 2015 Jan 23;9(8):1747–63. doi: 10.1038/ismej.2014.260 (PMC4511931; doi:10.1038/ismej.2014.260), 2015-01-23
Supplement: ismej2014260x8.pdf [file ismej2014260x8.pdf]

| Category                      | IMG gene ID                        | COG category                               | Product name                                           | Average %ID (aa) of recruited sequences (+/- SD) | Total number of sequences |
|-------------------------------|------------------------------------|--------------------------------------------|--------------------------------------------------------|--------------------------------------------------|---------------------------|
| Adhesin domains               | MG2_0389                           | [E] Amino acid metabolism and transport    | Conserved putative subtilisin peptidase                | 59 (+/- 17)                                      | 49                        |
|                               | MG2_0905                           | [E] Amino acid metabolism and transport    | Conserved putative beta-lytic metallopeptidase         | 50 (+/- 11)                                      | 339                       |
|                               | MG2_0906                           | [E] Amino acid metabolism and transport    | Conserved putative peptidase                           | 58 (+/- 12)                                      | 340                       |
|                               | MG2_0907                           | [E] Amino acid metabolism and transport    | Putative lipoprotein                                   | 69 (+/- 13)                                      | 25                        |
|                               | MG2_0909                           | [E] Amino acid metabolism and transport    | Conserved putative peptidase                           | 65 (+/- 14)                                      | 174                       |
|                               | MG2_0910                           | [E] Amino acid metabolism and transport    | Conserved putative peptidase                           | 58 (+/- 13)                                      | 143                       |
|                               | MG2_0911                           | [M] Cell wall/membrane/envelope biogenesis | Hypothetical protein with adhesin domains              | 63 (+/- 16)                                      | 144                       |
|                               | MG2_0390                           | [S] Function unknown                       | Hypothetical protein                                   | 49 (+/- 13)                                      | 73                        |
|                               | MG2_1415                           | [S] Function unknown                       | Putative giant membrane protein                        | 66 (+/- 20)                                      | 129                       |
| Vitamin binding and transport | MG2_0861                           | [I] Lipid transport and metabolism         | Methylmalonyl CoA mutase B12 binding protein           | 52 (+/- 16)                                      | 36                        |
|                               | MG2_1508                           | [I] Lipid transport and metabolism         | Methylmalonyl CoA mutase B12 binding protein           | 67 (+/- 17)                                      | 145                       |
|                               | MG2_1148                           | [I] Lipid transport and metabolism         | Methylmalonyl-CoA mutase, alpha/beta chain             | 55 (+/- 11)                                      | 148                       |
|                               | MG2_0324                           | [S] Function unknown                       | Cobalamin adenosyltransferase                          | 48 (+/- 14)                                      | 41                        |
|                               | MG2_0820                           | [H] Coenzyme transport and metabolism      | Lipoate-protein ligase B                               | 42 (+/- 16)                                      | 50                        |
|                               | MG2_0837                           | [C] Energy production and conversion       | pyruvate/2-oxoglutarate/2-oxoisovalerate dehydrogenase | 45 (+/- 14)                                      | 304                       |
|                               | MG2_0864                           | [I] Lipid transport and metabolism         | Biotin/lipoyl attachment protein                       | 41 (+/- 9)                                       | 32                        |
|                               | MG2_0880                           | [H] Coenzyme transport and metabolism      | BirA family transcriptional regulator                  | 63 (+/-28)                                       | 10                        |
|                               | MG2_1652                           | [I] Lipid transport and metabolism         | Biotin carboxylase                                     | 49 (+/- 12)                                      | 194                       |
|                               | MG2_1683                           | [I] Lipid transport and metabolism         | 3-methylcrotonyl-CoA carboxylase alpha subunit         | 52 (+/- 9)                                       | 12                        |
| MG2_1684                      | [I] Lipid transport and metabolism | Biotin carboxylase                         | 54 (+/- 11)                                            | 384                                              |                           |
| Fatty acid degradation        | MG2_1503                           | [I] Lipid transport and metabolism         | Long-chain acyl-CoA synthetase                         | 47 (+/- 15)                                      | 156                       |
|                               | MG2_0560                           | [I] Lipid transport and metabolism         | Acyl-CoA dehydrogenase                                 | 51 (+/- 20)                                      | 205                       |
|                               | MG2_0630                           | [I] Lipid transport and metabolism         | Acyl-CoA dehydrogenase                                 | 49 (+/- 15)                                      | 232                       |
|                               | MG2_1576                           | [I] Lipid transport and metabolism         | Enoyl-CoA hydratase/isomerase                          | 68 (+/-25)                                       | 39                        |
|                               | MG2_0458                           | [I] Lipid transport and metabolism         | 3-hydroxyacyl-CoA dehydrogenase                        | 53 (+/-21)                                       | 103                       |
|                               | MG2_1061                           | [I] Lipid transport and metabolism         | Acetyl-CoA acetyltransferase                           | 59 (+/- 27)                                      | 23                        |
|                               | MG2_0518                           | [I] Lipid transport and metabolism         | Acetyl-CoA C-acetyltransferase                         | 47 (+/- 13)                                      | 195                       |
|                               | MG2_0786                           | [I] Lipid transport and metabolism         | Acetyl-CoA C-acetyltransferase                         | 51 (+/- 12)                                      | 232                       |
|                               | MG2_0702                           | [I] Lipid transport and metabolism         | Glutaryl-CoA dehydrogenase                             | 57 (+/- 16)                                      | 202                       |
