# Supplementary figures and images for: Ecophysiology of uncultivated marine euryarchaea is linked to particulate organic matter
Source: PubMed Central journal article supplement — ISME J. 2015 Jan 23;9(8):1747–63. doi: 10.1038/ismej.2014.260 (PMC4511931; doi:10.1038/ismej.2014.260), 2015-01-23

**A.**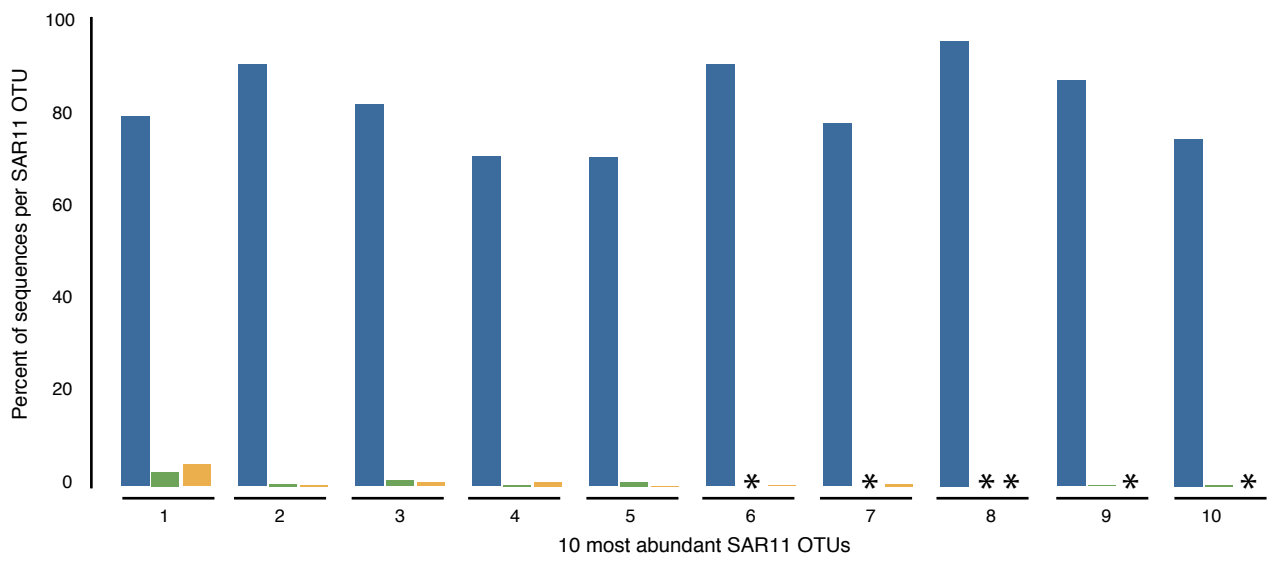**B.**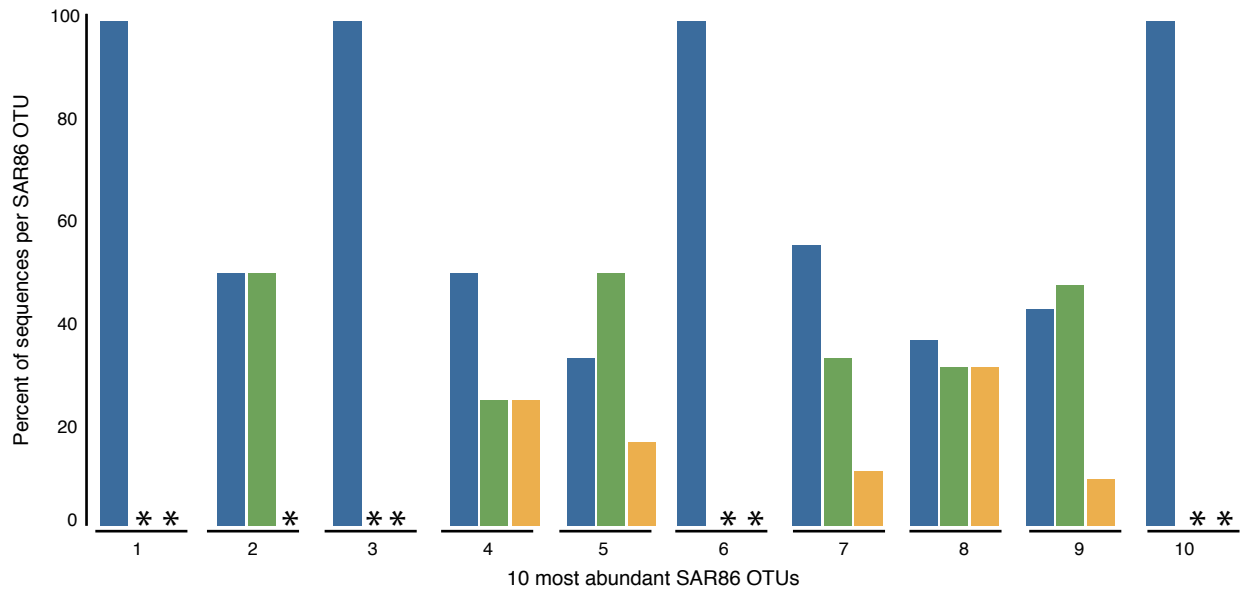**C.**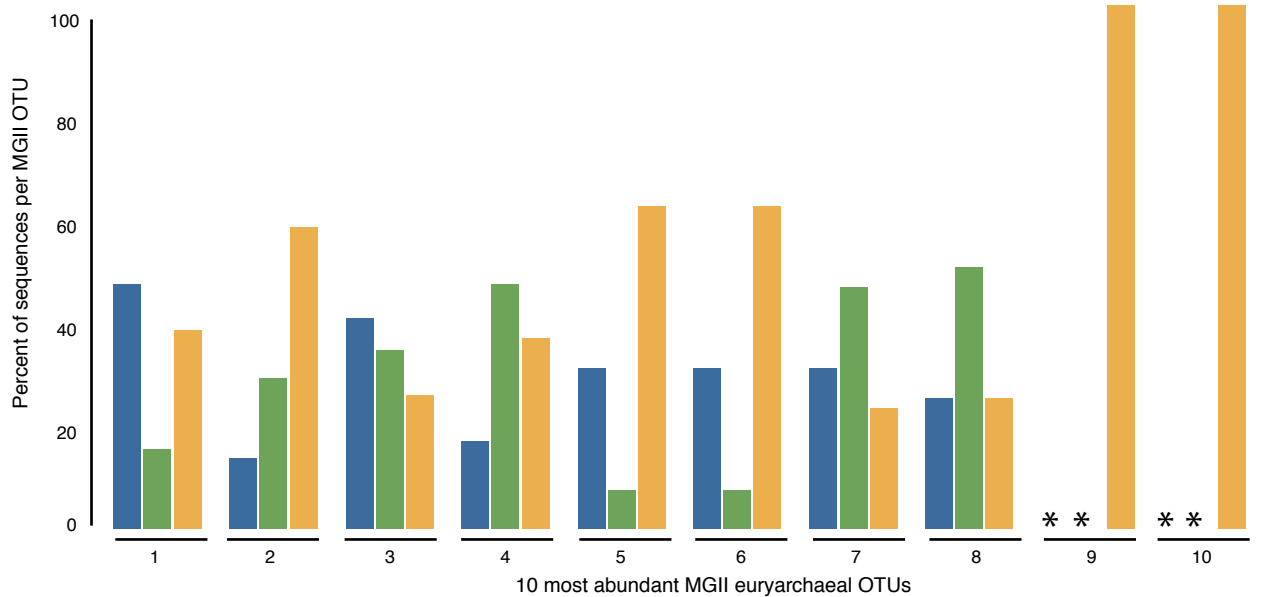

Supplement: ismej2014260x1.pdf [file ismej2014260x1.pdf]

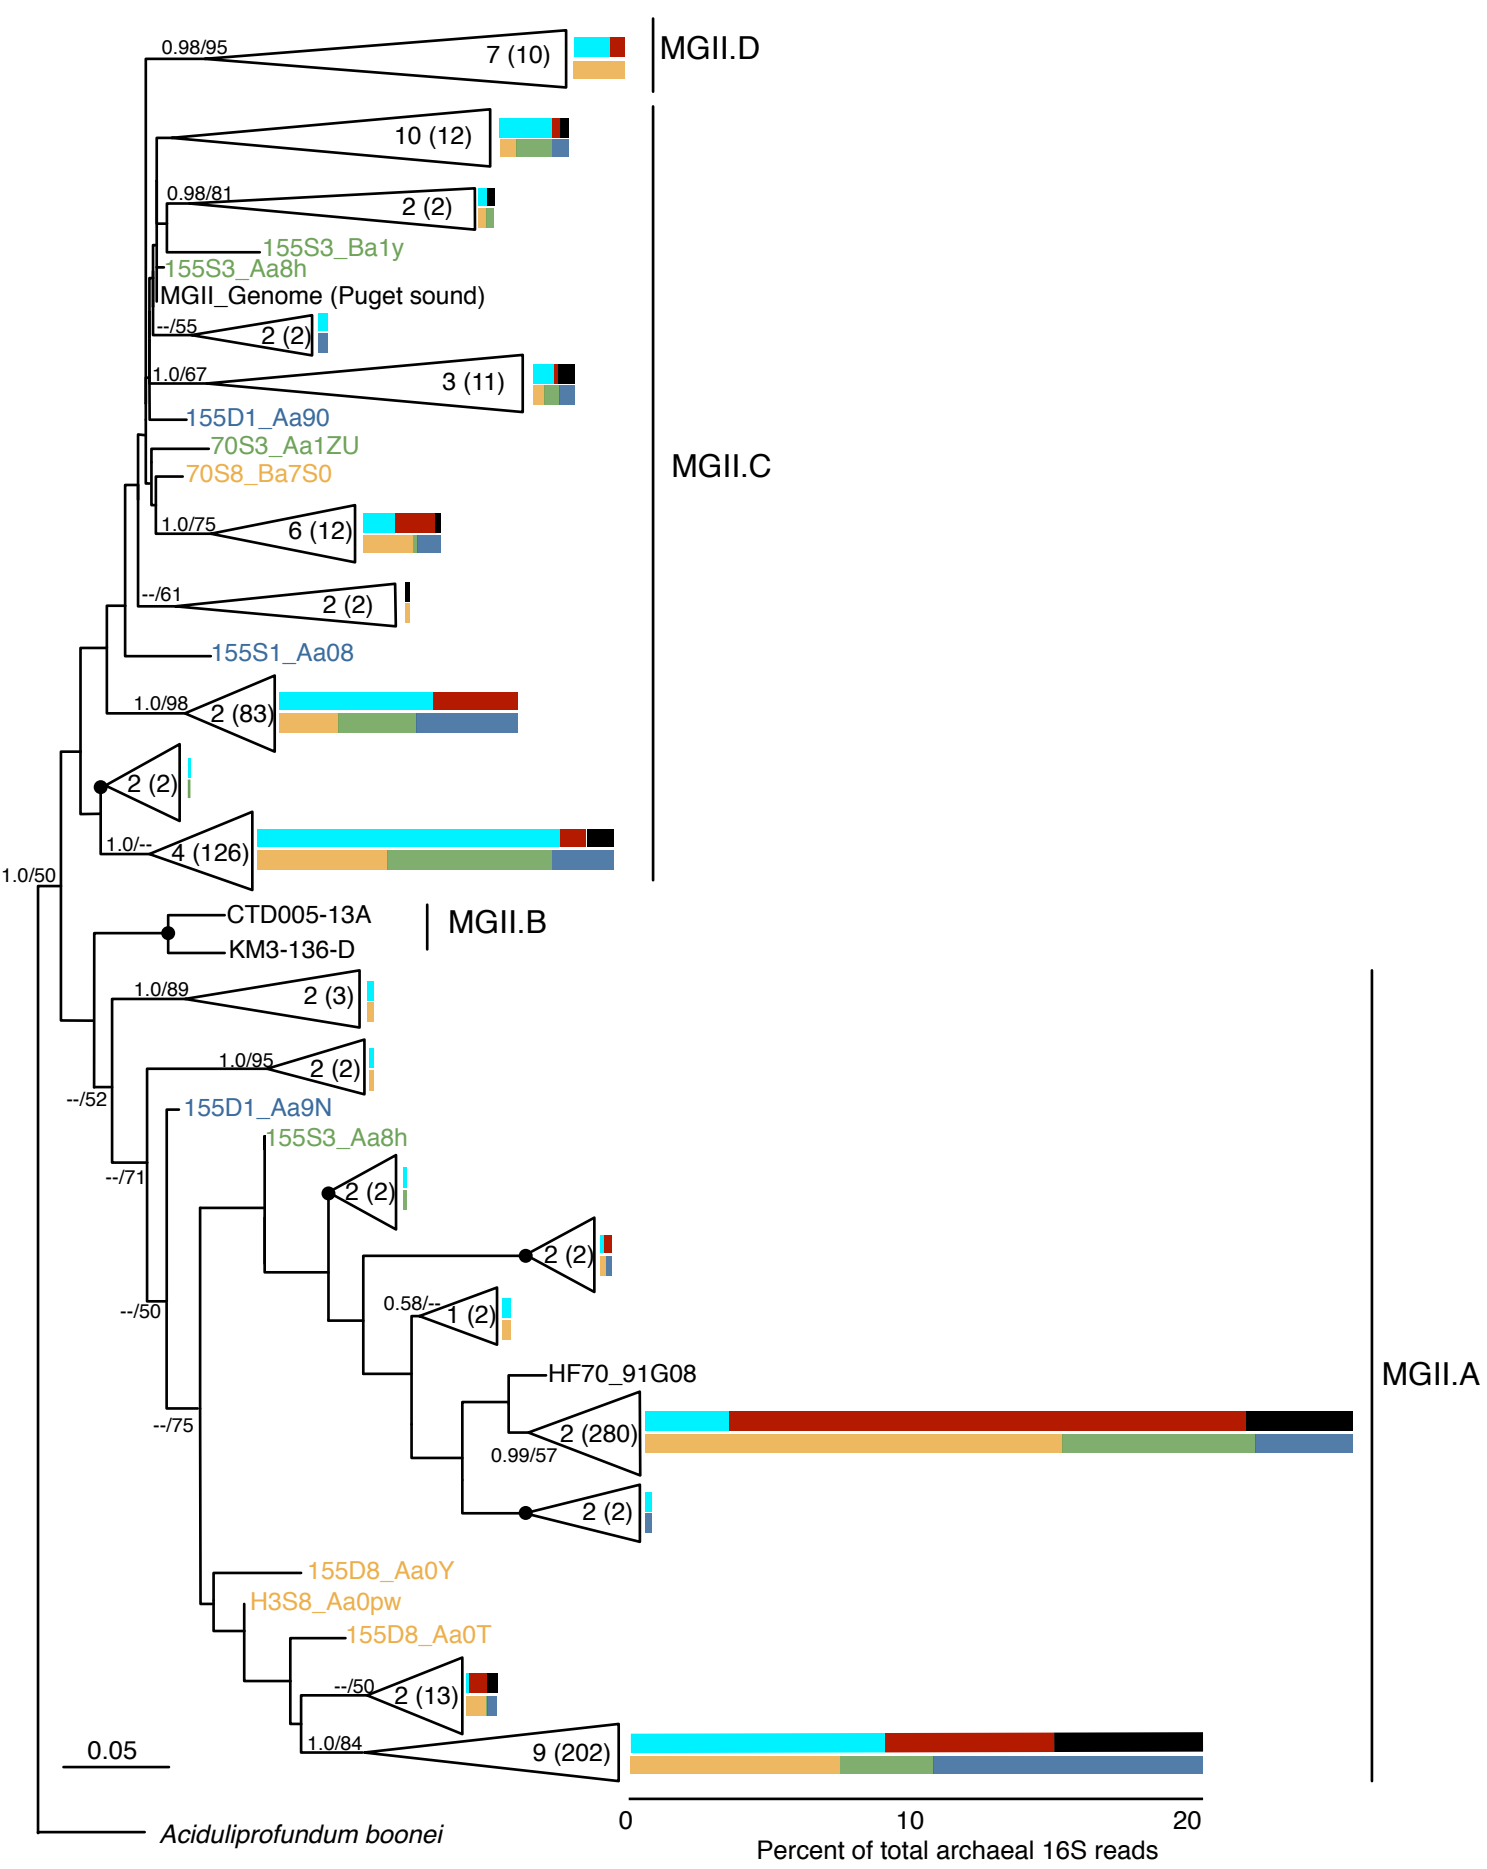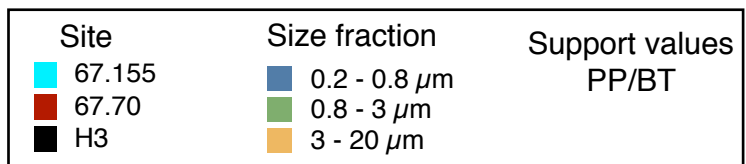

Supplement: ismej2014260x2.pdf [file ismej2014260x2.pdf]

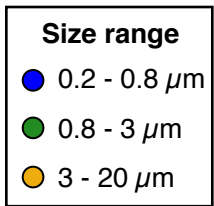

**A.**

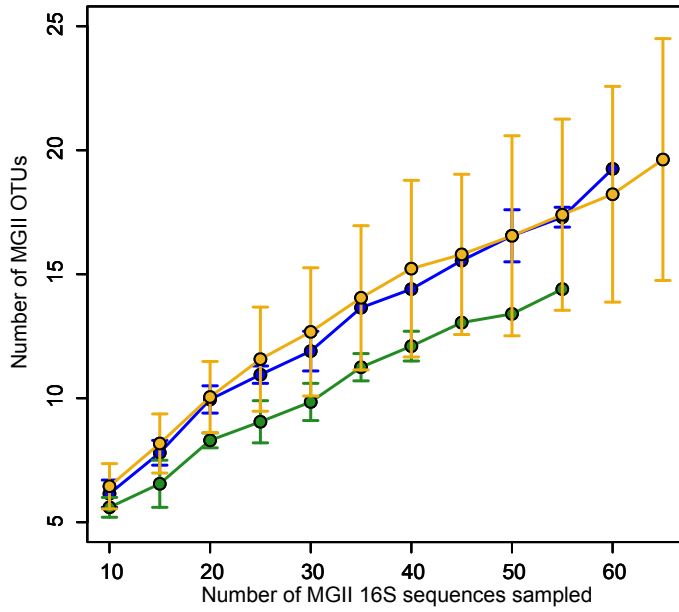

**B.**

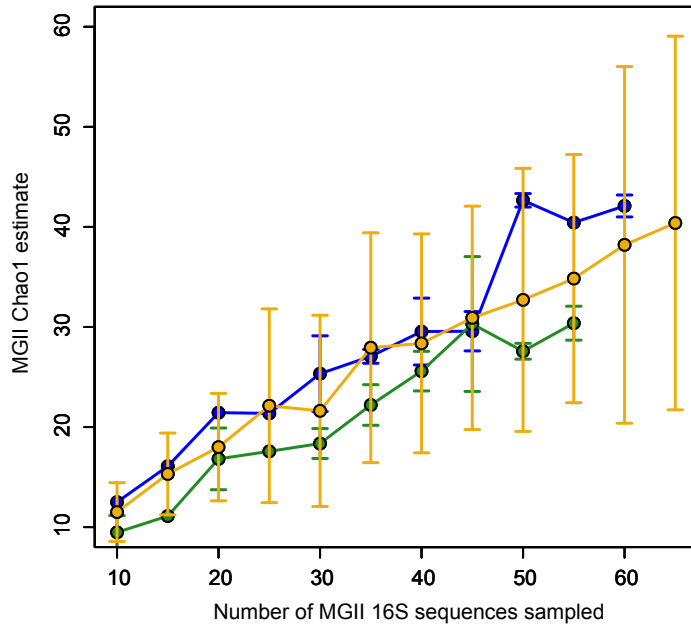

**C.**

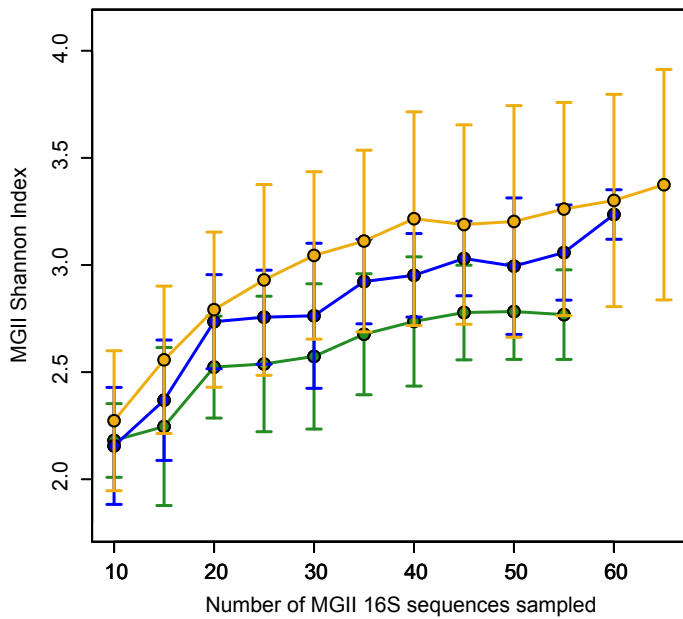

Supplement: ismej2014260x3.pdf [file ismej2014260x3.pdf]
